# Supplementary material
Source: Springer Nature journal article supplement (https://www.springermedizin.de/resource/supplementary/12943_2014_1442_MOESM3_ESM.pdf/9553004)

(a)

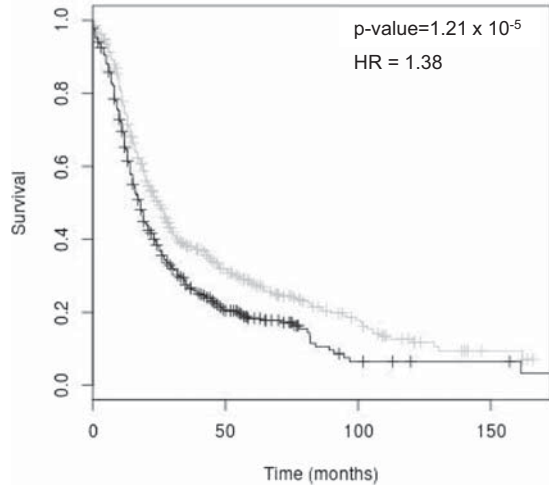

(b)

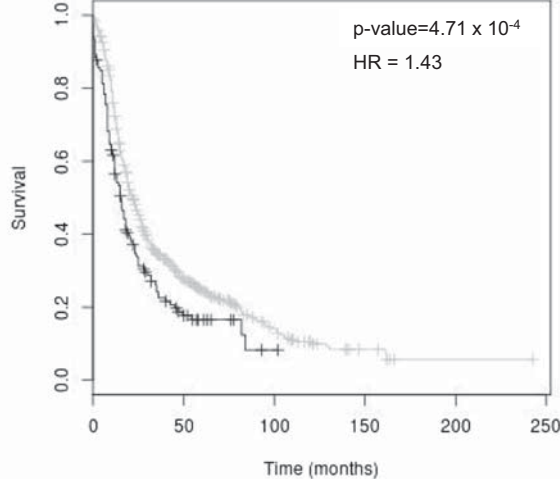

(c)

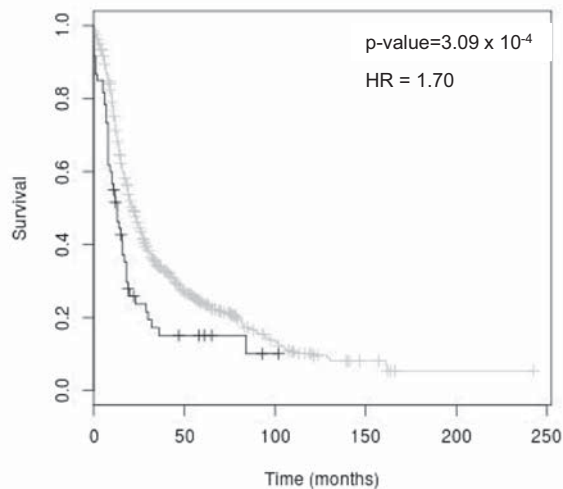

Supplement: MOESM3 [file 9553004]
